1 Genome-enabled insights into the ecophysiology of  
2 the comammox bacterium *Candidatus Nitrospira*  
3 *nitrosa*

4  
5 *Pamela Y. Camejo*<sup>1</sup>, *Jorge Santo Domingo*<sup>2</sup>, *Katherine D. McMahon*<sup>1,3</sup>, *Daniel R.*  
6 *Noguera*<sup>1,\*</sup>

7  
8 <sup>1</sup>Department of Civil and Environmental Engineering, University of Wisconsin - Madison,  
9 Madison, WI, USA

10 <sup>2</sup>Environmental Protection Agency, Cincinnati, OH, USA

11 <sup>3</sup>Department of Bacteriology, University of Wisconsin - Madison, Madison, WI, USA

12  
13 Email addresses:

14 [camejo.pamela@gmail.com](mailto:camejo.pamela@gmail.com)

15 [Santodomingo.Jorge@epa.gov](mailto:Santodomingo.Jorge@epa.gov)

16 [trina.mcmahon@wisc.edu](mailto:trina.mcmahon@wisc.edu)

17 [noguera@engr.wisc.edu](mailto:noguera@engr.wisc.edu)

18  
19 \* Corresponding author: Daniel R. Noguera, 1415 Engineering Drive, Madison, WI 53706.

20 Email: [noguera@engr.wisc.edu](mailto:noguera@engr.wisc.edu); Tel: 608-263-7783; Fax: 608-262-5199

21

22                   **ABSTRACT**

23           The recently discovered comammox bacteria have the potential to completely oxidize  
24 ammonia to nitrate. These microorganisms are part of the *Nitrospira* genus and are present in a  
25 variety of environments, including Biological Nutrient Removal (BNR) systems. However, the  
26 physiological traits within and between comammox- and nitrite oxidizing bacteria (NOB)-like  
27 *Nitrospira* species have not been analyzed in these ecosystems. In this study, we identified  
28 *Nitrospira* strains dominating the nitrifying community of a sequencing batch reactor (SBR)  
29 performing BNR under micro-aerobic conditions. We recovered metagenomes-derived draft  
30 genomes from two *Nitrospira* strains: (1) *Nitrospira* sp. UW-LDO-01, a comammox-like organism  
31 classified as *Candidatus Nitrospira nitrosa*, and (2) *Nitrospira* sp. UW-LDO-02, a nitrite oxidizing  
32 strain belonging to the *Nitrospira defluvii* species. A comparative genomic analysis of these strains  
33 with other *Nitrospira*-like genomes identified genomic differences in *Ca. Nitrospira nitrosa* mainly  
34 attributed to each strains' niche adaptation. Traits associated with energy metabolism also  
35 differentiate comammox from NOB-like genomes. We also identified several transcriptionally  
36 regulated adaptive traits, including stress tolerance, biofilm formation and micro-aerobic  
37 metabolism, which might explain survival of *Nitrospira* under multiple environmental conditions.  
38 Overall, our analysis expanded our understanding of the genetic functional features of *Ca.*  
39 *Nitrospira nitrosa*, and identified genomic traits that further illuminate the phylogenetic diversity  
40 and metabolic plasticity of the *Nitrospira* genus.

41

42

43

## 44 INTRODUCTION

45 Nitrification is a microbiological process that plays an important role in the nitrogen (N)  
46 cycle. This process has been conventionally known as a two-step reaction. The first step, oxidation  
47 of ammonia to nitrite, is performed by ammonia-oxidizing bacteria (AOB) or archaea (AOA) and  
48 the second step, oxidation of nitrite to nitrate, is carried out by nitrite-oxidizing bacteria (NOB).  
49 Recently, the discovery of a new player with the potential to completely oxidize ammonia to  
50 nitrate, as in the case of complete ammonia oxidizing (comammox) organisms,<sup>1,2</sup> has dramatically  
51 changed our understanding of microbial mediated N transformations in engineered and natural  
52 systems.

53 Comammox bacteria have been classified within the genus *Nitrospira*. Members of this  
54 genus were conventionally regarded as NOB and were thought to rely only on nitrite for growth.  
55 However, the genomes of the four comammox-like *Nitrospira* identified to date (*Ca. Nitrospira*  
56 *nitrosa*, *Ca. Nitrospira nitrificans*, *Ca. Nitrospira inopinata* and *Nitrospira* sp. Ga0074138<sup>1-3</sup>),  
57 encode the genes necessary for ammonia and nitrite oxidation, suggesting that *Nitrospira* are much  
58 more metabolically versatile organisms. Furthermore, comammox-like *Nitrospira* have been  
59 identified in a variety of habitats, including groundwater wells, drinking water biofilters,  
60 wastewater treatment plants (WWTPs) and other soil and aquatic environments.<sup>4</sup> These findings  
61 have prompted questions regarding the ecological significance and lifestyle of these organisms in  
62 each of these ecosystems.

63 Nutrient removal in WWTPs relies on nitrifying organisms to remove N from the  
64 wastewater. *Nitrospira*-like bacteria appear to be the dominant nitrite-oxidizers<sup>5-7</sup> in most WWTPs  
65 and laboratory scale reactors. The abundance of comammox in WWTPs has been briefly surveyed,

66 and preliminary results show this functional group is present in these systems.<sup>4</sup> However, genetic  
67 and functional adaptations of comammox to this environment have not been addressed.

68 In this study, the community performing N removal in a Biological Nutrient Removal (BNR)  
69 lab-scale reactor was analyzed to explore the genomic basis for comammox ecophysiology. A  
70 sequencing batch reactor (SBR) was operated under cyclic anaerobic and micro-aerobic conditions  
71 using two different operational conditions. During the first stage (nitrite addition during a micro-  
72 aerobic phase), two *Nitrospira*-like strains were enriched in the reactor. Draft genome sequences  
73 of these two strains were assembled from metagenomic data; one of them was identified as a  
74 commammox organism, the other as an NOB. Here, we used the draft genomes of these strains, as  
75 well as genomes from both NOB- and comammox-related bacteria, to perform a comparative  
76 genome analysis of the genus *Nitrospira*.

## 77 MATERIAL AND METHODS

### 78 Operation of Lab-Scale Sequencing Batch Reactor

79 A laboratory-scale SBR was originally inoculated with activated sludge obtained from the  
80 Nine Springs WWTP in Madison, WI, which uses a modified University of Cape Town (UCT)  
81 process designed to achieve biological P removal<sup>8</sup> and operates with high aeration rates.<sup>9</sup> Synthetic  
82 wastewater containing acetate as the sole carbon source was used for the feed, as described  
83 elsewhere.<sup>10</sup> The hydraulic retention time (HRT) and solids retention time (SRT) were 24 h and  
84 80 days, respectively. The pH in the system was controlled to be between 7.0 and 7.5.

85 The 2-liter reactor was operated under alternating anaerobic and low oxygen cycles. During  
86 Stage 1 of operation the cycles consisted of 2 h anaerobic, 5 h micro-aerobic, 50 min settling and  
87 10 min decanting. At the beginning of the micro-aerobic phase, sodium nitrite was added to reach

88 an in-reactor concentration of 10 mg N-NO<sub>2</sub><sup>-</sup>/L and stimulate the use of nitrite as an electron donor.  
89 In addition, an on/off control system was used to limit the amount of oxygen pumped to the reactor  
90 (0.02 L/min) and maintain low dissolved oxygen (DO) concentrations in the mixed liquor, as  
91 described elsewhere.<sup>10</sup> After 100 days of operation, the nitrite supplement was eliminated and the  
92 reactor cycle was changed to: 1.5 h anaerobic, 5.5 h micro-aerobic, 50 min settling and 10 min  
93 decanting (Stage 2).

#### 94 **Sample Collection and Analytical Tests**

95 To monitor reactor performance, mixed liquor and effluent samples were collected, filtered  
96 through a membrane filter (0.45 μm; Whatman, Maidstone, UK) and analyzed for acetate, PO<sub>4</sub><sup>3-</sup>-  
97 P, NH<sub>4</sub><sup>+</sup>-N, NO<sub>3</sub><sup>-</sup>-N, and NO<sub>2</sub><sup>-</sup>-N. The concentrations of PO<sub>4</sub><sup>3-</sup>-P were determined according to  
98 Standard Methods.<sup>11</sup> Total ammonia (NH<sub>3</sub> + NH<sub>4</sub><sup>+</sup>) concentrations were analyzed using the  
99 salicylate method (Method 10031, Hach Company, Loveland, CO). Acetate, nitrite and nitrate  
100 were measured using high-pressure liquid chromatography as previously described.<sup>10</sup>

101 Biomass samples from the reactors were collected weekly and stored at -80°C until DNA  
102 extraction was performed. DNA was extracted using UltraClean® Soil DNA Isolation Kit (MoBIO  
103 Laboratories, Carlsbad, CA). Extracted DNA was quantified using a NanoDrop spectrophotometer  
104 (Thermo Fisher Scientific, Waltham, MA) and stored at -80°C.

#### 105 **Metagenome Sequencing, Assembly and Binning**

106 Samples from day 100 (Stage 1) and days 317, 522 and 674 (Stage 2) were selected for  
107 metagenomic analysis. Illumina TruSeq DNA PCR free libraries were prepared for DNA extracts  
108 according to the manufacturer's protocol and paired-end sequenced on either the Illumina HiSeq  
109 2000 platform (v4 chemistry, 2 × 150 bp; 522-day sample), or the Illumina MiSeq platform (v3

110 chemistry,  $2 \times 250$  bp; other samples). Unmerged reads were quality-trimmed and filtered with  
111 Sickle (<https://github.com/ucdavis-bioinformatics/sickle.git>), using a minimum phred score of 20  
112 and a minimum length of 50 bp. The metagenomic reads from the 100-day sample (Stage 1) were  
113 assembled using IDBA-UD.<sup>12</sup> Individual genome bins were extracted from the metagenome  
114 assembly with the R package ‘mmgenome’<sup>13</sup> using the differential coverage principle.<sup>14</sup> The bins  
115 were initially extracted by plotting the genome coverage of contigs in metagenomes from day 100  
116 and 317. During the bin extraction, GC content and taxonomy of contigs were also taken into  
117 consideration.

118 After binning, SSPACE was used to filter small scaffolds (length < 1,000 bp), extend  
119 scaffolds, and to fill gaps.<sup>15</sup> Genome completeness and contamination was estimated using  
120 CHECKM 0.7.1.<sup>16</sup> Table S1 displays quality metrics of the draft genomes after each of the steps  
121 previously described. Two putative *Nitrospira*-like bins were identified and annotated using  
122 MetaPathways v 2.0.<sup>17</sup> To further reduce contamination in these assembled bins, scaffolds with  
123 Open Reading Frames (ORFs) having less than 85% nucleotide identity and 0% protein identity  
124 to other *Nitrospira* genomes were removed from the bins.

### 125 **Average Nucleotide Identity (ANI)**

126 Pair-wise ANI values of *Nitrospira*-like genomes were obtained using the ANIm method<sup>18</sup>  
127 and implemented in the Python script ‘calculate\_ani.py’ available at  
128 [https://github.com/ctSkenneron/scriptShed/blob/master/calculate\\_ani.py](https://github.com/ctSkenneron/scriptShed/blob/master/calculate_ani.py).

### 129 **Phylogenetic Analyses**

130 The phylogeny of the draft genomes was assessed by constructing a phylogenetic tree using  
131 a concatenated alignment of marker genes. First, PhyloSift v 1.0.1<sup>19</sup> was used to extract a set of 38

132 marker genes from each genome. Then, the extracted marker protein sequences were concatenated  
133 into a continuous alignment to construct a maximum-likelihood (ML) tree, using RAxML v  
134 7.2.8.<sup>20</sup> RAxML generated 100 rapid bootstrap replicates followed by a search for the best-scoring  
135 ML tree.

136 For phylogenetic analyses of ammonia monooxygenase subunit A (*amoA*), hydroxylamine  
137 reductase (*hao*) and nitrite oxido-reductase subunit A (*nxrA*) genes, full nucleotide datasets were  
138 downloaded from the NCBI GenBank database.<sup>21</sup> Alignment was performed on sequences  
139 retrieved from the NCBI and the draft genomes using the ‘AlignSeqs’ command in the DECIPHER  
140 “R” package.<sup>22</sup> Phylogenetic trees were calculated using neighbor-joining criterion with 1,000  
141 bootstrap tests for every node, using the MEGA6 software package.<sup>23</sup> Trees were visualized with  
142 the assistance of TreeGraph.<sup>24</sup>

### 143 **Population Structure by Metagenomic Analysis**

144 To estimate the abundance of currently known ammonia oxidizers, comammox, and nitrite  
145 oxidizers in the reactor over time, paired-end DNA reads from the metagenomic datasets (days  
146 100, 317, 522 and 674) were competitively mapped to the published genome sequence of 14 AOB  
147 (*Nitrosomonas*, *Nitrospira* and *Nitrosococcus* genera), 6 AOA (*Nitrososphaera*,  
148 *Nitrosoarchaeum* and *Nitrosopumilus*), 5 NOB (*Nitrospira* and *Nitrobacter* lineage), 5 anaerobic  
149 ammonia-oxidizing (anammox) bacteria (*Ca. Brocadia fulgida*, *Ca. Brocadia caroliniensis*, *Ca.*  
150 *Kuenenia stuttgartiensis*, *Ca. Brocadia sinica* and *Ca. Jettenia caeni*), 4 comammox bacteria (*Ca.*  
151 *Nitrospira nitrosa*, *Ca. Nitrospira nitrificans*, *Ca. Nitrospira inopinata* and *Nitrospira* sp.  
152 Ga0074138) and the two *Nitrospira*-like draft genomes retrieved from the reactor, using the  
153 software package BBMap version 35.85 (<https://sourceforge.net/projects/bbmap>). A list of the  
154 genomes included in this analysis and the number of reads mapping to each sequence is found in

155 Table S2. For each organism, the number of unambiguous reads (best hit) mapping to the genomic  
156 sequence with a minimum alignment identity of 90% was quantified and normalized by the number  
157 of reads in each metagenome, paired-end reads average length and genome size (Table S2).

### 158 **Orthologous Genes Clusters**

159 To assess the degree of homology in the proteomes of the two *Nitrospira*-like genomes,  
160 orthologous genes clusters (OCs) were determined using OrthoMCL.<sup>25</sup> OrthoMCL was run with a  
161 BLAST E-value cut-off of  $1e-5$ , and an inflation parameter of 1.5.

162 Protein products of each ortholog set were compared against the Eggnog database<sup>26</sup> using  
163 the eggNOG-mapper tool (<https://github.com/jhcepas/eggnog-mapper>) ( $e$ -value  $<10e^{-2}$ ) to  
164 determine the COG functional and super-functional category to which they belong.

### 165 **Accession Numbers**

166 Raw reads and draft genome sequences have been submitted to NCBI and are accessible  
167 under the BioProject identifier PRJNA322674.

## 168 **RESULTS AND DISCUSSION**

### 169 **Nutrient Removal in Lab-Scale Reactor**

170 Results from a typical cycle of the lab-scale SBR at steady-state operation during Stage 1 are  
171 shown in Fig. 1. During the anaerobic phase, acetate added at the beginning of the anaerobic phase  
172 was completely consumed within an hour (Fig. 1B). P release to the mixed liquor during this  
173 condition was not observed (Fig. 1B), indicating the absence of polyphosphate accumulating  
174 organisms (PAO) in the reactor. Denitrification was incomplete, with only  $\sim 60\%$  of the nitrate  
175 removed in the anaerobic phase (Fig. 1A), even though the reactor received acetate in this phase.  
176 This suggests that efficient acetate uptake was likely performed by glycogen accumulating



177 organisms (GAO), without affecting P concentrations.<sup>27</sup> In addition, nitrite production during this  
178 phase (~ 10%) is an indicator of partial denitrification (Fig. 1A).

179 Complete nitrification occurred in the subsequent micro-aerobic stage, where  $91\% \pm 4\%$  of  
180 ammonia and  $91\% \pm 8\%$  of the added nitrite were removed (Fig. 1A), with nitrate accumulation  
181 accounting for  $50\% \pm 2\%$  of the oxidized nitrogen. During the period of active nitrification, the DO  
182 remained below 0.05 mg/L (Fig. 1C), as the oxygen supplied balanced the oxygen uptake rate. The  
183 oxygen uptake rate decreased after nitrification ceased, and correspondingly, DO increased. To  
184 maintain a low-DO environment, aeration was stopped when DO exceeded the set point (0.2 mg  
185 O<sub>2</sub>/L) and resumed when DO decreased below the set point. This operation effectively maintained  
186 DO below 0.4 mg/L (Fig. 1C).

187 After 100 days of reactor operation under these conditions, the operational parameters were  
188 changed to promote simultaneous nitrification, denitrification and P removal (Stage 2). Unlike  
189 Stage 1, no nitrite was added to the reactor during micro-aerobic conditions. During this second  
190 stage, acetate added at the beginning of the anaerobic phase was used by PAOs for P-cycling, and  
191 nitrite and nitrate produced by ammonia oxidization were used as electron acceptors by PAOs  
192 during micro-aerobiosis, achieving simultaneous removal of N and P. Results of this stage were  
193 described elsewhere.<sup>10</sup>

#### 194 ***Nitrospira*-like Genome Binning**

195 Using a combination of bidimensional coverage and tetranucleotide frequency, two  
196 *Nitrospira*-like draft genomes were assembled from a sample collected at the end of Stage 1. The  
197 two draft genomes (*Nitrospira* sp. UW-LDO-1 and UW-LDO-2) had 3.9 and 3.5 Mbp in total with  
198 average GC content of 54.9% and 59.2%, respectively (Table S1). The reconstructed genomes

199 were assessed to be nearly complete (completeness  $\geq 90\%$ ) with low contamination ( $\leq 5\%$ ),  
200 according to the presence of 43 single-copy reference genes (Table S1).

201 Since the composite genomes did not encode complete 16S rRNA genes, the average  
202 nucleotide sequence identity (ANI) between the draft genomes assembled herein and formerly  
203 published *Nitrospira*-like genomes, was used to determine whether UW-LDO-1 and UW-LDO-2  
204 represented distinct species, as this method has been shown to correlate well with previously  
205 defined 16S rRNA gene species boundaries.<sup>28</sup> The calculated ANI and fraction of alignment for  
206 the *Nitrospira* genomes (Fig. 2) showed that UW-LDO-01 is a representative of the *Ca. Nitrospira*  
207 *nitrosa* species (ANI >94%, Fraction Aligned = 74.9%), while UW-LDO-02 had the closest  
208 nucleotide identity to *Nitrospira defluvii* (ANI = 92.4%, Fraction Aligned = 72.4%). None of the  
209 other ANI values were greater than 88%, indicating that the two genomes were different from each  
210 other, and supports their classification as *Nitrospira nitrosa* UW-LDO-01 and *Nitrospira defluvii*  
211 UW-LDO-02, respectively.

## 212 **Phylogenetic Analysis**

213 A genome tree constructed from a concatenated protein alignment of 38 universally  
214 distributed single-copy marker genes<sup>29</sup> confirms the affiliation of *Nitrospira* sp. UW-LDO-01 and  
215 UW-LDO-02 with *Ca. Nitrospira nitrosa* and *Nitrospira defluvii*, respectively (Fig. 3). Consistent  
216 with this phylogeny, UW-LDO-01 encoded the *amoCAB* operon, responsible for ammonia  
217 oxidation, while UW-LDO-02 did not.

218 The *amoA* and *hao* genes are functional genes involved in redox nitrogen transformations  
219 and are also considered phylogenetic markers to study the diversity of ammonia oxidizing  
220 microorganisms (AOM).<sup>30-33</sup> The phylogenetic tree topologies based on these genes (Fig. S1)

221 further confirm the classification of UW-LDO-01 as related to *Ca. Nitrospira nitrosa*, although  
222 two paralogs of the *amoA* gene are present in the genome of *Ca. Nitrospira nitrosa*, while only  
223 one *amoA* gene was found in UW-LDO-1.

224 In addition, the *Nitrospira* sp. UW-LDO-1 and UW-LDO-2 genomes encoded the key  
225 enzyme for nitrite oxidation, *nxr*, which can also be used as a phylogenetic biomarker. UW-LDO-  
226 1 encoded two paralogs of the periplasmic NXR enzyme while *Nitrospira* UW-LDO-2 only  
227 encoded one copy. The affiliation of UW-LDO-1 with *Ca. Nitrospira nitrosa* and UW-LDO-2 with  
228 *N. defluvii* was supported by phylogeny based on the *nxA* gene sequence (Fig. S2), consistent  
229 with the phylogenetic analysis of *amoA* and *hao*.

### 230 **Nitrifying Prokaryotes in Lab-Scale Reactor**

231 The metagenomic analysis of the Stage 1 sample, which corresponds to the operational  
232 conditions when nitrite and ammonia were both present under micro-aerobic conditions, did not  
233 result in the assembly of any other genome of nitrifying microorganisms. Thus, in order to assess  
234 the relative abundance of other known nitrifying prokaryotes present in the reactor, we mapped  
235 metagenomic reads to published genomes of comammox, anammox, AOB, AOA and NOB,  
236 including *Nitrospira* sp. UW-LDO-01 and UW-LDO-02 (Fig. 3). After a competitive mapping of  
237 short-reads from metagenomic samples to each genome (>90% identity), the number of mapping  
238 reads was normalized to both metagenome size and reference genome size, and used as a proxy of  
239 genome abundance.

240 The metagenomic data show little evidence of AOA and anammox bacteria during the two  
241 stages (0.06% and 0.25% of mapping reads, respectively). AOB were detected in the system, albeit  
242 representing a small fraction of the community (0.17% and 0.05% of total number of reads during  
243 Stage 1 and 2, respectively). Noticeably, *Nitrospira*-like sequences (including comammox- and

244 NOB-like genomes) recruited the greatest number of metagenomic reads (14.0% of total number  
245 of reads) in the Stage 1 sample (Fig. 4A). Within this genus, *Nitrospira* sp. UW-LDO-01 retrieved  
246 32.3% of the reads competitively mapping to the *Nitrospira*-like genomes (Fig. 4B). The published  
247 genome of *Ca. Nitrospira nitrosa* retrieved 2.3% of the reads, while less than 4% mapped to other  
248 comammox genomes. Therefore, with only a small fraction of reads mapping to other ammonia  
249 oxidizers, we propose that *Nitrospira* sp. UW-LDO-01 was the main comammox in the reactor,  
250 and the main contributor to ammonia oxidation during Stage 1.

251 *Nitrospira* sp. UW-LDO-02 appeared to be the most abundant NOB in the reactor during  
252 Stage 1, retrieving 42.4% of the *Nitrospira*-like reads (Fig. 4B), although a large fraction of reads  
253 competitively mapping to *N. defluvii* may indicate the presence of other nitrite oxidizing strains in  
254 the reactor. Therefore, the nitrite oxidation activity in the reactor was carried out by comammox  
255 and NOB.

256 The metagenomic analysis of Stage 2 samples reveals an overall decrease in the relative  
257 abundance of nitrifying organisms in the reactor after transitioning to this operational  
258 configuration (Fig. 4A). During this stage, metagenomic reads mapping to NOB and comammox  
259 genomes (including *Nitrospira* sp. UW-LDO-01 and UW-LDO-02) decreased to less than 1% of  
260 the total number of reads. This was in part due to the removal of nitrite addition during Stage 2.  
261 However, the decrease in comammox did not correspond to an increase in the number of reads  
262 mapping to other known AOM (Fig. 4A), suggesting the presence of still unrecognized AOM in  
263 reactors operated with low DO conditions, as previously reported.<sup>34</sup>

#### 264 **Differential Gene Content Among *Ca. Nitrospira nitrosa* Genomes**

265 Since *Nitrospira* sp. UW-LDO-01 is the second comammox genome representative of *Ca.*  
266 *Nitrospira nitrosa*, and the first comammox genome recovered from a nutrient removal bioreactor,

267 a comparative analysis of its genetic content was carried out. First, a comparison of gene content  
268 among *Ca. Nitrospira nitrosa* (CZQA00000000) and *Nitrospira* sp. UW-LDO-01 was conducted  
269 by BlastP comparison of the translated coding DNA sequence (CDS) set, clustering of ortholog  
270 proteins, and annotation of representatives of each ortholog cluster (OC) and genome-unique  
271 CDSs.

272 Overall, sequencing and annotation of the UW-LDO-01 genome revealed a genomic  
273 inventory highly similar to the genome of *Ca. Nitrospira nitrosa*.<sup>2</sup> The two genomes shared 81.2%  
274 of the OCs (3,202 OCs), with UW-LDO-01 and *Ca. Nitrospira nitrosa* having 740 and 857 unique  
275 OCs, respectively (Fig. 5A).

276 OCs belonging to the shared and genome-specific fractions of the two genomes were  
277 classified according to their predicted functional role (Fig. 5B-C). 2,906 and 3,009 OCs, in the  
278 UW-LDO-01 and *Ca. Nitrospira nitrosa* genomes, respectively, were categorized into functional  
279 Clusters of Orthologous Groups (COG) categories. The majority of OCs belonged to the group of  
280 “Unknown Function (S)” (23% of shared OCs, and 19% and 23% of the genome-specific fraction  
281 in UW-LDO-01 and *Ca. Nitrospira nitrosa*, respectively), indicating a large set of metabolic  
282 features not yet elucidated (Fig. 5B-C).

283 Besides the genes of unknown function, OCs within this shared fraction were mostly  
284 represented by the “Cell wall/membrane/envelope biogenesis (M)” (7%), “Signal transduction  
285 mechanisms (T)” (6%) and “Energy production and conversion (C)” (6%) families, indicating  
286 general conservation of energy metabolism and regulatory mechanisms.

287 In both genomes, the functional group “Replication, recombination and repair (L)” was over-  
288 represented within the genome-specific fraction. This functional category includes transposases,  
289 integrases and other mobile genetic elements, and their extensive representation in the genome-

290 specific fraction indicates that horizontal gene transfer has likely played a significant role in the  
291 diversification of *N. nitrosa* strains. The greatest difference among the genome-specific fractions  
292 of UW-LDO-01 and *Ca. Nitrospira nitrosa* was the proportion of OCs represented by the “Cell  
293 wall/membrane/envelope biogenesis (M)” and “Intracellular trafficking, secretion, and vesicular  
294 transport (U)” functional families (Fig. 5C). Glycosyltransferases<sup>35-38</sup>, Type IV<sup>39-41</sup> secretion  
295 system proteins and other enzymes involved in polysaccharide formation (main component of the  
296 biofilm matrix) were enriched within these COG categories in the genome-specific fraction of *Ca.*  
297 *Nitrospira nitrosa*. Differences in biofilm formation capabilities between these strains may relate  
298 to specific niche adaptation: *Ca. Nitrospira nitrosa* was enriched in a biofilm, whereas UW-LDO-  
299 01 was found in a planktonic habitat in wastewater. Analogous findings have been observed in  
300 other genera, where differences among biofilm formation capabilities within the same genus were  
301 linked to the genome content of different strains.<sup>42-44</sup> Similar to the results presented here, these  
302 genetic differences included the presence of type IV secretion systems and enzymes involved in  
303 protein glycosylation.

304 The comparative genomic analysis also indicated a higher proportion of gene clusters  
305 associated with “Lipid transport and metabolism (I)” in *Nitrospira* sp. UW-LDO-01 (Fig. 5C).  
306 Genes related to  $\beta$ -oxidation of long-chain fatty acids to acetyl-CoA were present in the genome  
307 of UW-LDO-01, but absent in *Ca. Nitrospira nitrosa*. These genes include a long-chain fatty acid-  
308 CoA ligase, acyl-CoA dehydrogenase, enoyl-CoA hydratase, 3-hydroxyacyl-CoA dehydrogenase  
309 and acetyl-CoA acetyltransferase. Presence of these lipid-related metabolic genes in other  
310 *Nitrospira* strains was confirmed, although the complete pathway is lacking in *Nitrospira defluvii*,  
311 *Ca. Nitrospira nitrificans* and *Nitrospira* sp. Ga0074138. This feature may represent a competitive  
312 advantage of some *Nitrospira* strains in habitats rich in long-chain fatty acids, such as WWTPs.<sup>45</sup>

### 313 **Metabolic Features in *Nitrospira* Genomes**

314 To explore the diverse metabolic capabilities and provide insights into the common and  
315 unique metabolic features encoded in the genome of NOB- and comammox-like strains, we  
316 compared the gene inventory of 9 complete and draft genomes classified as *Nitrospira*. The  
317 analysis was focused on traits associated to energy production, which are summarized in Table S3.

318 In agreement with previous analyses, only comammox-like genomes encoded ammonia  
319 monooxygenase (*amoCAB*) and hydroxylamine dehydrogenase (*haoAB-cycAB*) gene clusters,  
320 responsible for ammonia oxidation to nitrite (Table S3), reflecting the capability of this novel  
321 *Nitrospira* sub-lineage to perform full-nitrification from ammonia to nitrate.

322 Analysis of nitrite reducing genes revealed that all *Nitrospira* strains encoded a copper-  
323 containing dissimilatory nitrite reductases (*nirK*), which catalyzes the nitrite reduction to nitric  
324 oxide, a key step in the denitrification process. Despite the widespread presence of this enzyme  
325 across the *Nitrospira* genus, former studies have documented no activity of this protein in NOB-  
326 like<sup>46</sup> or comammox-like strains<sup>1</sup>, where N loss caused by formation of gaseous compounds was  
327 not observed. Since it has been predicted that the NXR complex of *Nitrospira* can reduce nitrate  
328 to nitrite,<sup>46</sup> these microorganisms appear genetically capable of converting nitrate (product of  
329 nitrification) to nitric oxide. Additional experiments are still needed to obtain more insights into  
330 this *Nitrospira* trait. Other denitrification genes, such as nitrate reductase (*nar*), nitric oxide  
331 reductase (*nor*) or nitrous oxide reductase (*nos*), were not found in the *Nitrospira* strains analyzed  
332 here.

333 All comammox-like genomes, including UW-LDO-01, encoded the machinery to hydrolyze  
334 urea: the *ureABCDEFG* urease operon and the *urtABCDE* urea transport system, suggesting that  
335 this *Nitrospira* sub-division possesses a high-affinity uptake system for urea and, thus, is adapted

336 to habitats where urea is present at low levels. A gene cluster involved in urea metabolism was  
337 also found in *N. moscoviensis* (Table S3), although the urea-binding proteins *urtBCDE* were  
338 lacking in the genome. Ureolytic activity of both *N. moscoviensis*, *Ca. Nitrospira nitrosa* and *Ca.*  
339 *Nitrospira nitrificans* was formerly tested by incubation of these strains with urea-containing  
340 media, where urea hydrolysis to ammonium was observed in both cases.<sup>2, 46</sup> Former studies have  
341 also shown the presence of genes for urea utilization in *Nitrospira lenta*,<sup>47</sup> a novel *Nitrospira*  
342 species enriched under low temperatures, suggesting that the ureolytic activity might be associated  
343 with this lineage. Since several ammonia oxidizers also possess the capability of hydrolyzing  
344 urea,<sup>48-50</sup> the presence of this trait in *Nitrospira* might evidence horizontal gene transfer among  
345 these functional groups.

346 A contrasting difference among NOB-like and comammox-like genomes was the capability  
347 to convert cyanate into ammonia. Only NOB-like genomes encoded a cyanase hydratase enzyme;  
348 former studies have experimentally confirmed cyanate degradation in *N. moscoviensis*.<sup>51</sup> Cyanate  
349 is produced intracellularly from urea and carbamoyl phosphate decomposition,<sup>52, 53</sup> and in the  
350 environment from the chemical/physicochemical decomposition of urea or cyanide.<sup>54, 55</sup> The  
351 presence of a cyanase enzyme benefits nitrite oxidizers because it allows them to detoxify cyanate,  
352 and the formed ammonium is then available for assimilation and might also serve as a source of  
353 energy for ammonia oxidizers in a process described as “reciprocal feeding”.<sup>46, 51</sup> Further  
354 experiments analyzing the effect of cyanate in the growth on comammox-like bacteria are needed  
355 to understand how cyanate degradation would confer them a biological advantage, besides  
356 generation of ammonia.

357 The analysis also revealed the presence of the gene inventory for the uptake and oxidation  
358 of formate, an exclusive feature of NOB. Growth on formate as electron donor has been confirmed



359 in *N. moscoviensis* (under both micro-oxic and anoxic incubations),<sup>46</sup> *Nitrospira japonica*<sup>56</sup> and  
360 uncultured *Nitrospira* in activated sludge.<sup>57</sup> Although formate oxidation should be advantageous  
361 for organisms thriving in hypoxic or anoxic habitats, which also includes comammox-like bacteria,  
362 this feature is absent in the genome of these microorganisms.

363 The genome of *N. moscoviensis* encodes a group 2a [Ni-Fe] hydrogenase (*hupS* and *hupL*)  
364 and accessory proteins involved in the maturation and transcriptional regulation of hydrogenases  
365 (*hypFCDEAB* and *hoxA*). Furthermore, experiments showed that *N. moscoviensis* was capable of  
366 growing by aerobic respiration of H<sub>2</sub>.<sup>58</sup> Although the comammox-like genomes lack the subunits  
367 of the [Ni-Fe] hydrogenase (Hup), the five genomes analyzed here encoded a group 3 [Ni-Fe]  
368 sulfur-reducing hydrogenase gene set (*hydBGDA* and *hydD*) positioned at the same locus where  
369 Hup is located in *N. moscoviensis*. This hydrogenase complex is a heterotetramer with both  
370 hydrogenase activity and sulfur reductase activity, which might play a role in hydrogen cycling  
371 during fermentative growth.<sup>59</sup> Its beta and gamma subunits, that form the sulfur reducing  
372 component, catalyze the cytoplasmic production of hydrogen sulfide in the presence of elemental  
373 sulfur. The presence of this complex in the genomes indicates the potential of these  
374 microorganisms for oxidizing H<sub>2</sub> using sulfur as electron acceptor, a trait that has not been  
375 analyzed in comammox before, but that could confer this sub-group an advantage when growing  
376 under anaerobic conditions.

377 Furthermore, the presence of a hyf-like operon (*hyfBCEFGI*), which encodes a putative  
378 group 4 hydrogenase complex, was detected in every NOB-like genome, as well as *Ca. Nitrospira*  
379 *nitrosa*, *Nitrospira* sp. Ga0074138 and UW-LDO-01. In *Escherichia coli*, this hydrogenase  
380 complex forms part of a second formate hydrogenlyase pathway (oxidation of formate to CO<sub>2</sub> and  
381 reduction of 2H<sup>+</sup> to H<sub>2</sub> under fermentative conditions).<sup>60</sup> This is likely the case for the

382 hydrogenase-4 present in the genome of NOB-like strains, which co-occur with genes encoding  
383 formate dehydrogenase. In comammox, however, the role of this distinct hydrogenase is not as  
384 clear. In *Ca. Nitrospira nitrosa*, this complex is found immediately adjacent to a carbon monoxide  
385 dehydrogenase (CODH), an enzyme that catalyzes the interconversion of CO and CO<sub>2</sub><sup>61</sup>, a  
386 genomic feature that would allow this strain to obtain energy from carbon monoxide.<sup>62</sup> Conversely,  
387 the genomes of *Nitrospira* sp. Ga0074138 and UW-LDO-01 lack the CODH at this position, which  
388 in the case of UW-LDO-01, was confirmed by alignment of the metagenomic reads to this gene.  
389 No other neighboring gene of the hydrogenase-4 complex could be associated with this enzyme in  
390 these two strains, therefore, the biological role of these genes is still unclear.

391 Altogether, these results reveal specific traits characterizing the NOB and comammox  
392 functional groups: while comammox-like *Nitrospira* has the genomic potential of ammonia and  
393 nitrite oxidation and potentially, sulfur reduction, NOB-like strains are distinguished by their  
394 cyanate degradation and formate oxidation capabilities; and both urea hydrolysis and H<sub>2</sub>  
395 respiration are common traits shared by multiple *Nitrospira* strains.

### 396 **The Role of Transcriptional Regulation in *Nitrospira***

397 Transcriptional regulation of gene expression is the most commonly used strategy to control  
398 many of the biological processes in an organism, including progression through the cell cycle,  
399 metabolic and physiological balance, and responses to environmental stress. This regulation is  
400 generally orchestrated by several transcriptional factors (TFs) that directly coordinate the activity  
401 of genes by binding to their promoters. Each *Nitrospira*-like genome codes for at least 100  
402 transcriptional regulators, which account for ~3% of the estimated total number of genes, in  
403 agreement with TFs in other microorganisms.<sup>63-65</sup> A comparative genomic analysis of full and draft

404 *Nitrospira* genomes was used to investigate the repertoire of TFs potentially involved in the  
405 survival of these microorganisms under diverse environmental conditions (Table 1).

406 Among the TFs analyzed, the formate hydrogenlyase transcriptional activator (fhlA)<sup>60, 66</sup> was  
407 the only one shared across all the *Nitrospira* genomes, although only NOB-like genomes encode  
408 genes of its known regulon, the formate hydrogenase complex. The presence of this transcriptional  
409 activator in comammox microorganisms, which appear to be genetically incapable of formate  
410 oxidation (Table 1), might represent an ancestral trait shared by *Nitrospira* and lost during  
411 diversification. This theory would also support the presence of the group 4 hydrogenase  
412 (associated with the formate-hydrogenlyase complex in *E. coli*) in both NOB- and comammox-  
413 like groups.

414 A common feature among some NOB and comammox bacteria is the presence of the  
415 transcriptional regulators NhaR<sup>67, 68</sup> and OxyR<sup>69</sup> (Table 1). The first one is associated with stress  
416 response to alkaline, acidic, saline and osmotic conditions. OxyR regulates hydrogen peroxide-  
417 inducible genes, such as alkyl hydroperoxide reductase (*ahpCF*) and glutaredoxin (*grxA*), encoded  
418 in all the *Nitrospira* genomes. Presence of these genes would confer *Nitrospira* an improved fitness  
419 advantage over other nitrifying bacteria. For instance, NhaR is lacking in *Nitrosomonas* and  
420 *Nitrobacter* and OxyR is not present in *Nitrosomonas* and *Nitrosospira* (based on genome search).  
421 Furthermore, the role of NhaR during regulation of *pga* expression,<sup>68</sup> allows the biofilm formation  
422 process to be considered as a flexible and dynamic developmental process driven by external  
423 conditions, representing another means by which NhaR could promote survival of *Nitrospira*.  
424 Likewise, the presence of the chemotaxis regulator CheZ in *Nitrospira* suggests chemotaxis as  
425 another important mechanism by which these microorganisms efficiently and rapidly respond to  
426 changes in the chemical composition of their environment.

427 To date, the role of the Fnr-type regulatory protein in *Nitrospira* has not been determined.  
428 In other microorganisms, Fnr is part of the signaling involved in the adaptation to micro-oxic  
429 environments,<sup>70-74</sup> where it acts as oxygen sensor and regulator of genes involved in anaerobic and  
430 micro-aerobic metabolism. In *Nitrospira*, we predict that this TF would regulate similar genes,  
431 such as the *frd* operon (fumarate reductase), *sdh* operon (succinate dehydrogenase), *ndh* (NADH  
432 dehydrogenase) and *ccb3* complex (cytochrome c oxidase). At least one copy of Fnr in the  
433 genomes of UW-LDO-01, *N. moscoviensis*, *N. defluvii* and *N. sp.* OLB-3 was located upstream of  
434 a copper-containing nitrite reductase gene (*nirK*), suggesting a possible mechanism that controls  
435 expression of this denitrification enzyme. The presence of multiple paralog copies of Fnr in several  
436 *Nitrospira* genomes may indicate a rigorous regulation of metabolism when these microorganisms  
437 are exposed to low levels of oxygen, an important factor affecting *Nitrospira* community  
438 compositions in nitrifying systems.<sup>75</sup>

439 Overall, this study sheds light about differences in the physiological role of NOB and  
440 comammox-like *Nitrospira*. Specifically, the comparative genomic results evidence traits  
441 associated with energy metabolism as characteristic to each of these functional groups.  
442 Furthermore, the analysis of TFs in *Nitrospira* reveals the alternative use of organic compounds,  
443 response to environmental stress, chemotaxis and anaerobic metabolism as some of the key  
444 mechanisms for the adaptive metabolism of the genus to multiple and adverse conditions. Further  
445 studies in the field should include experiments that combine omics-analysis (transcriptomics,  
446 metabolomics, and proteomics) with chemical data to confirm the ecological role and functionality  
447 of each of these functional groups and their interactions with other microorganisms.

#### 448 **ACKNOWLEDGMENTS**

449           This work was partially supported by funding from the National Science Foundation (CBET-  
450 1435661 and MCB-1518130) and the Madison Metropolitan Sewerage District. Additional  
451 funding from the Chilean National Commission for Scientific and Technological Research  
452 (CONICYT) as a fellowship to Pamela Camejo is also acknowledged. The U.S. Environmental  
453 Protection Agency, through its Office of Research and Development, partially funded and  
454 collaborated in the research described herein. Any opinions expressed in this paper are those of  
455 the authors and do not necessarily reflect the views of the agency; therefore, no official  
456 endorsement should be inferred. Any mention of trade names or commercial products does not  
457 constitute endorsement or recommendation for use.

458

## FIGURES

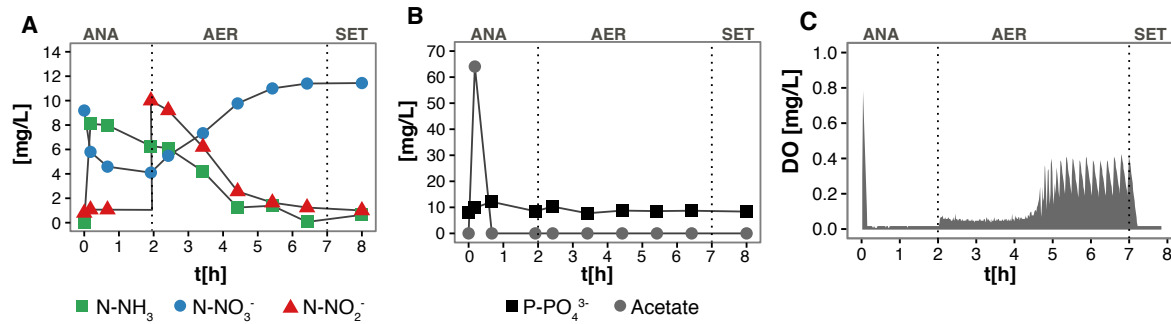

459

460 **Figure 1.** Nutrient profiles of (A) nitrogenous compounds, (B) phosphorous and acetate, and (C)  
 461 oxygen concentration in a regular cycle of the lab-scale SBR during Stage 1. ANA: Anaerobic,  
 462 AER: Micro-aerobic, SET: Settling.

463

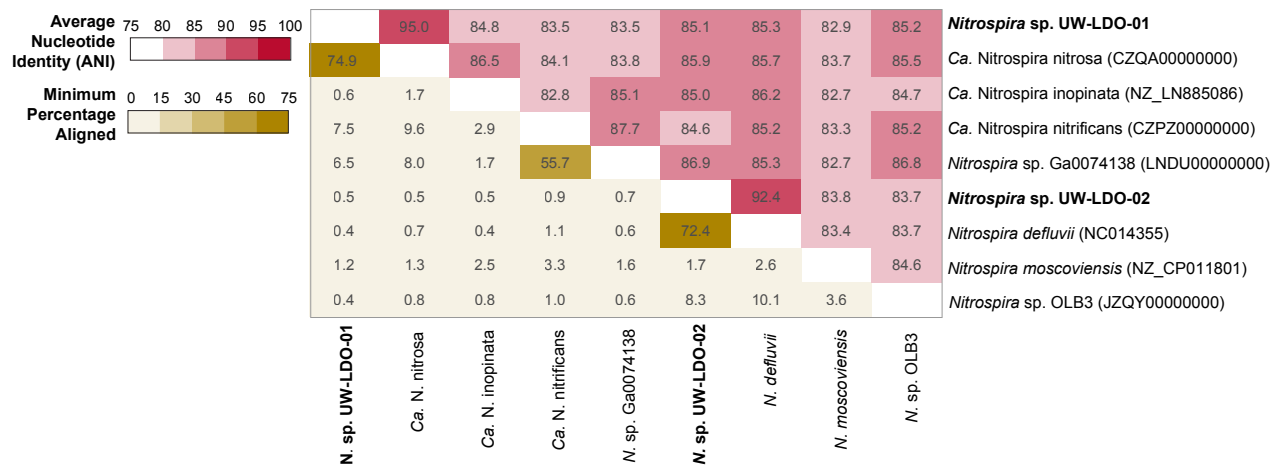

464

465 **Figure 2.** Comparison of the genome-wide average nucleotide identity and alignment percentage,  
 466 of *Nitrospira*-like genomes. The heatmap shows the average nucleotide identity (red upper section  
 467 of matrix) and the percentage of the two genomes that aligned (yellow lower section).

468

469

470

471

472

473

474

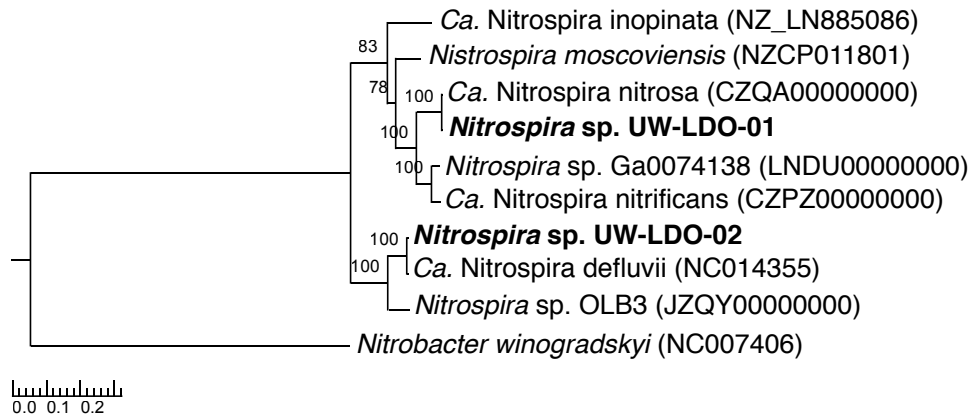

475 **Figure 3.** RAxML phylogenetic tree of a concatenated alignment of 37 marker genes (nucleotide  
476 sequence) data set with the root placed on the branch leading to *Nitrobacter winogradskyi*. The  
477 numbers at the nodes of both trees show support values derived from 100 RAxML bootstrap.

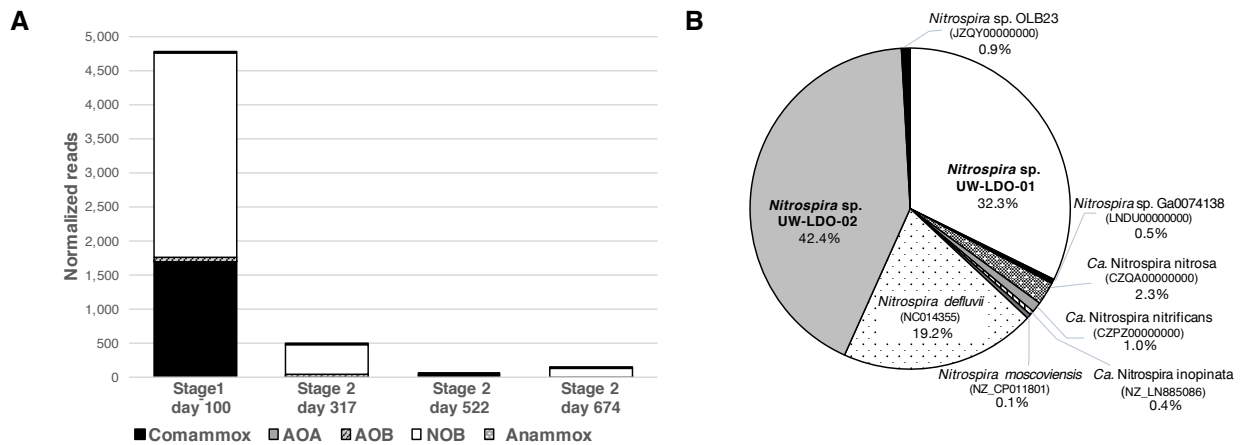

478 **Figure 4.** (A) Normalized frequency of metagenomic reads mapping to the genome of  
479 Comammox, AOB, AOA, NOB and Anammox-related organisms in samples from Stage 1 and 2  
480 of the lab-scale SBR. (B) Relative abundance of reads mapping to genomes of *Nitrospira*-related  
481 bacteria in Stage 1 sample, including the draft genomes retrieved in this study.

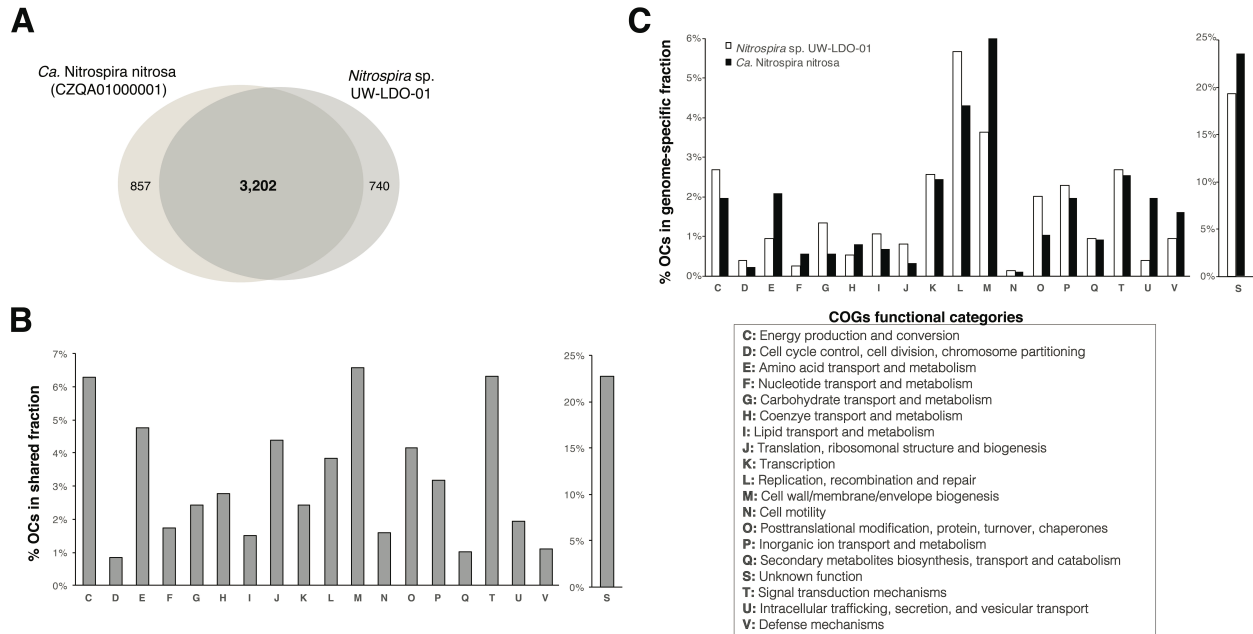

482 **Figure 5.** Genomic differences between *Nitrospira sp.* UW-LDO-01 and *Ca. Nitrospira nitrosa*.  
 483 (A) Venn diagram of ortholog clusters shared between the two draft genomes; (B) distribution of  
 484 COGs functional classes in the fraction of orthologs shared by the two genomes; (C) distribution  
 485 of COGs functional classes in ortholog clusters found in only one of the genomes (genome-specific  
 486 fraction).



487

## TABLES

488 **Table 1.** Inventory of transcriptional regulators with implications on adaptive metabolism,

489 from complete and draft genomes of *Nitrospira*. Grey and white rectangles represent

490 presence and absence of each gene, respectively.

| Transcriptional Regulator                         | Gene        | Comammox                        |                               |                                   |                                 |                                 |                                 | NOB                            |                           |                            | Function                                                                                                                                                                                                                                                                                                                                                                                                                                                                                                                                                                                            |
|---------------------------------------------------|-------------|---------------------------------|-------------------------------|-----------------------------------|---------------------------------|---------------------------------|---------------------------------|--------------------------------|---------------------------|----------------------------|-----------------------------------------------------------------------------------------------------------------------------------------------------------------------------------------------------------------------------------------------------------------------------------------------------------------------------------------------------------------------------------------------------------------------------------------------------------------------------------------------------------------------------------------------------------------------------------------------------|
|                                                   |             | <i>Nitrospira</i> sp. UW-LDO-01 | <i>Ca. Nitrospira nitrosa</i> | <i>Ca. Nitrospira nitrificans</i> | <i>Ca. Nitrospira inopinata</i> | <i>Nitrospira</i> sp. Ga0074138 | <i>Nitrospira</i> sp. UW-LDO-02 | <i>Nitrospira moscoviensis</i> | <i>Nitrospira defluvi</i> | <i>Nitrospira</i> sp. OL23 |                                                                                                                                                                                                                                                                                                                                                                                                                                                                                                                                                                                                     |
| Formate hydrogenlyase transcriptional activator   | <i>fhIA</i> | Grey                            | Grey                          | Grey                              | Grey                            | Grey                            | Grey                            | Grey                           | Grey                      | Grey                       | FhIA binds to formate hydrogenlyase structural genes (formate dehydrogenase and group 4 hydrogenase complex) to activate transcription of their promoters <sup>66</sup> .                                                                                                                                                                                                                                                                                                                                                                                                                           |
| Transcriptional activator protein NhaR            | <i>nhaR</i> | Grey                            | Grey                          | Grey                              | Grey                            | Grey                            | Grey                            | Grey                           | White                     | Grey                       | NhaR regulates <i>nhaA</i> , a pH-dependent sodium-proton antiporter that responds to alkaline and saline conditions <sup>76</sup> . It is also responsible for <i>osmC</i> induction <sup>67</sup> , required for resistance to organic peroxides and osmotic conditions and for long-term survival in stationary phase <sup>77,78</sup> . NhaR also stimulates <i>pga</i> transcription, a set of genes responsible of poly-β-1,6-N-acetyl-D-glucosamine (PGA) synthesis <sup>68</sup> . PGA is involved in cell-cell adhesion and attachment, which stabilizes biofilm formation <sup>79</sup> . |
| Hydrogen peroxide-inducible genes activator       | <i>oxyR</i> | Grey                            | Grey                          | Grey                              | Grey                            | Grey                            | White                           | Grey                           | Grey                      | Grey                       | OxyR is required for the induction of a hydrogen peroxide-inducible regulon in response to elevated levels of hydrogen peroxide <sup>69</sup> .                                                                                                                                                                                                                                                                                                                                                                                                                                                     |
| Chemotaxis regulator CheZ                         | <i>cheZ</i> | Grey                            | Grey                          | Grey                              | Grey                            | Grey                            | White                           | Grey                           | Grey                      | Grey                       | CheZ is a component of the chemotaxis signal-transduction pathway <sup>80</sup> . It controls the phosphorylation of CheY, a protein involved in the cell excitation response. Absence of CheZ results in non-chemotactic cells or long stimuli response latencies, demonstrating its critical importance during response to stimuli <sup>81</sup> .                                                                                                                                                                                                                                                |
| Fumarate and nitrate reductase regulatory protein | <i>fnr</i>  | Grey                            | Grey                          | Grey                              | White                           | White                           | Grey                            | Grey                           | Grey                      | Grey                       | Fnr is an oxygen-responsive regulator required for the expression of a number of genes involved in anaerobic metabolism <sup>73,82,83</sup> , including fumarate reductase, nitrate and nitrite reductase, and cytochrome oxidase genes <sup>84</sup>                                                                                                                                                                                                                                                                                                                                               |

491

492

493

494

495

496

497

498

499           **ASSOCIATED CONTENT**

500           **Supplementary Material.** Supplementary Figures and Tables supporting the information  
501 presented in this manuscript.

502

503           **REFERENCES**

504 1.       Daims, H.; Lebedeva, E. V.; Pjevac, P.; Han, P.; Herbold, C.; Albertsen, M.; Jehmlich,  
505 N.; Palatinszky, M.; Vierheilig, J.; Bulaev, A.; Kirkegaard, R. H.; von Bergen, M.; Rattei, T.;  
506 Bendinger, B.; Nielsen, P. H.; Wagner, M., Complete nitrification by *Nitrospira* bacteria.  
507 *Nature* **2015**, *528*, (7583), 504-9.

508 2.       van Kessel, M. A. H. J.; Speth, D. R.; Albertsen, M.; Nielsen, P. H.; Op den Camp, H.  
509 J. M.; Kartal, B.; Jetten, M. S. M.; Lucker, S., Complete nitrification by a single  
510 microorganism. *Nature* **2015**, *528*, (7583), 555-+.

511 3.       Palomo, A.; Jane Fowler, S.; Gulay, A.; Rasmussen, S.; Sicheritz-Ponten, T.; Smets, B.  
512 F., Metagenomic analysis of rapid gravity sand filter microbial communities suggests novel  
513 physiology of *Nitrospira* spp. *ISME J* **2016**, *10*, (11), 2569-2581.

514 4.       Pjevac, P.; Schauburger, C.; Poghosyan, L.; Herbold, C. W.; van Kessel, M. A. H. J.;  
515 Daebeler, A.; Steinberger, M.; Jetten, M. S. M.; Lucker, S.; Wagner, M.; Daims, H., Amo-  
516 targeted polymerase chain reaction primers for the specific detection and quantification of  
517 comammox *Nitrospira* in the environment. *bioRxiv* **2017**.

518 5.       Okabe, S.; Satoh, H.; Watanabe, Y., In situ analysis of nitrifying biofilms as determined  
519 by in situ hybridization and the use of microelectrodes. *Appl Environ Microb* **1999**, *65*, (7),  
520 3182-3191.

- 521 6. Daims, H.; Nielsen, J. L.; Nielsen, P. H.; Schleifer, K. H.; Wagner, M., In situ  
522 characterization of Nitrospira-like nitrite-oxidizing bacteria active in wastewater treatment  
523 plants. *Appl Environ Microbiol* **2001**, *67*, (11), 5273-84.
- 524 7. Juretschko, S.; Timmermann, G.; Schmid, M.; Schleifer, K. H.; Pommerening-Roser,  
525 A.; Koops, H. P.; Wagner, M., Combined molecular and conventional analyses of nitrifying  
526 bacterium diversity in activated sludge: Nitrosococcus mobilis and Nitrospira-like bacteria as  
527 dominant populations. *Appl Environ Microbiol* **1998**, *64*, (8), 3042-51.
- 528 8. Zilles, J. L.; Peccia, J.; Kim, M. W.; Hung, C. H.; Noguera, D. R., Involvement of  
529 Rhodocyclus-related organisms in phosphorus removal in full-scale wastewater treatment  
530 plants. *Appl Environ Microb* **2002**, *68*, (6), 2763-2769.
- 531 9. Park, H. D.; Whang, L. M.; Reusser, S. R.; Noguera, D. R., Taking advantage of  
532 aerated-anoxic operation in a full-scale University of Cape Town process. *Water Environment*  
533 *Research* **2006**, *78*, (6), 637-642.
- 534 10. Camejo, P. Y.; Owen, B. R.; Martirano, J.; Ma, J.; Kapoor, V.; Santo Domingo, J.;  
535 McMahon, K. D.; Noguera, D. R., Candidatus Accumulibacter phosphatis clades enriched  
536 under cyclic anaerobic and microaerobic conditions simultaneously use different electron  
537 acceptors. *Water Research* **2016**, *102*, 125-137.
- 538 11. APHA In *Standard methods for the examination of water and wastewater*, Washington,  
539 DC, 2005; Andrew D. Eaton, L. S. C., Eugene W. Rice, Arnold E. Greenberg, Ed. Washington,  
540 DC, 2005.
- 541 12. Peng, Y.; Leung, H. C. M.; Yiu, S. M.; Chin, F. Y. L., IDBA-UD: a de novo assembler  
542 for single-cell and metagenomic sequencing data with highly uneven depth. *Bioinformatics*  
543 **2012**, *28*, (11), 1420-1428.

- 544 13. Karst, S. M.; Kirkegaard, R. H.; Albertsen, M., mmgenome: a toolbox for reproducible  
545 genome extraction from metagenomes. *bioRxiv* **2016**.
- 546 14. Albertsen, M.; Karst, S. M.; Ziegler, A. S.; Kirkegaard, R. H.; Nielsen, P. H., Back to  
547 Basics--The Influence of DNA Extraction and Primer Choice on Phylogenetic Analysis of  
548 Activated Sludge Communities. *PLoS One* **2015**, *10*, (7), e0132783.
- 549 15. Boetzer, M.; Henkel, C. V.; Jansen, H. J.; Butler, D.; Pirovano, W., Scaffolding pre-  
550 assembled contigs using SSPACE. *Bioinformatics* **2011**, *27*, (4), 578-579.
- 551 16. Parks, D. H.; Imelfort, M.; Skennerton, C. T.; Hugenholtz, P.; Tyson, G. W., CheckM:  
552 assessing the quality of microbial genomes recovered from isolates, single cells, and  
553 metagenomes. *Genome Res* **2015**, *25*, (7), 1043-55.
- 554 17. Hanson, N. W.; Konwar, K. M.; Hawley, A. K.; Altman, T.; Karp, P. D.; Hallam, S. J.,  
555 Metabolic pathways for the whole community. *BMC Genomics* **2014**, *15*, 619.
- 556 18. Richter, M.; Rossello-Mora, R., Shifting the genomic gold standard for the prokaryotic  
557 species definition. *Proceedings of the National Academy of Sciences of the United States of*  
558 *America* **2009**, *106*, (45), 19126-19131.
- 559 19. Darling, A. E.; Jospin, G.; Lowe, E.; Matsen, F. A. t.; Bik, H. M.; Eisen, J. A., PhyloSift:  
560 phylogenetic analysis of genomes and metagenomes. *PeerJ* **2014**, *2*, e243.
- 561 20. Stamatakis, A., RAxML-VI-HPC: maximum likelihood-based phylogenetic analyses  
562 with thousands of taxa and mixed models. *Bioinformatics* **2006**, *22*, (21), 2688-90.
- 563 21. Clark, K.; Karsch-Mizrachi, I.; Lipman, D. J.; Ostell, J.; Sayers, E. W., GenBank.  
564 *Nucleic Acids Research* **2016**, *44*, (D1), D67-D72.

- 565 22. Wright, E. S., DECIPHER: harnessing local sequence context to improve protein  
566 multiple sequence alignment. *Bmc Bioinformatics* **2015**, *16*.
- 567 23. Tamura, K.; Stecher, G.; Peterson, D.; Filipski, A.; Kumar, S., MEGA6: Molecular  
568 Evolutionary Genetics Analysis version 6.0. *Molecular Biology and Evolution* **2013**, *30*, (12),  
569 2725-9.
- 570 24. Muller, J.; Muller, K., TREEGRAPH: automated drawing of complex tree figures using  
571 an extensible tree description format. *Molecular Ecology Notes* **2004**, *4*, (4), 786-788.
- 572 25. Li, L.; Stoeckert, C. J.; Roos, D. S., OrthoMCL: Identification of ortholog groups for  
573 eukaryotic genomes. *Genome Research* **2003**, *13*, (9), 2178-2189.
- 574 26. Huerta-Cepas, J.; Szklarczyk, D.; Forslund, K.; Cook, H.; Heller, D.; Walter, M. C.;  
575 Rattei, T.; Mende, D. R.; Sunagawa, S.; Kuhn, M.; Jensen, L. J.; von Mering, C.; Bork, P.,  
576 eggNOG 4.5: a hierarchical orthology framework with improved functional annotations for  
577 eukaryotic, prokaryotic and viral sequences. *Nucleic Acids Research* **2016**, *44*, (D1), D286-  
578 D293.
- 579 27. Bin, Z.; Bin, X.; Zhigang, Q.; Zhiqiang, C.; Junwen, L.; Taishi, G.; Wenci, Z.; Jingfeng,  
580 W., Denitrifying capability and community dynamics of glycogen accumulating organisms  
581 during sludge granulation in an anaerobic-aerobic sequencing batch reactor. *Sci Rep* **2015**, *5*,  
582 12904.
- 583 28. Konstantinidis, K. T.; Tiedje, J. M., Genomic insights that advance the species  
584 definition for prokaryotes. *Proceedings of the National Academy of Sciences of the United*  
585 *States of America* **2005**, *102*, (7), 2567-2572.

- 586 29. Wu, D. Y.; Jospin, G.; Eisen, J. A., Systematic Identification of Gene Families for Use  
587 as "Markers" for Phylogenetic and Phylogeny-Driven Ecological Studies of Bacteria and  
588 Archaea and Their Major Subgroups. *Plos One* **2013**, *8*, (10).
- 589 30. Keluskar, R.; Desai, A., Evaluation of hydroxylamine oxidoreductase as a functional  
590 and phylogenetic marker to differentiate *Nitrosomonas* spp. *Journal of Basic Microbiology*  
591 **2014**, *54*, (4), 261-268.
- 592 31. Junier, P.; Molina, V.; Dorador, C.; Hadas, O.; Kim, O. S.; Junier, T.; Witzel, K. P.;  
593 Imhoff, J. F., Phylogenetic and functional marker genes to study ammonia-oxidizing  
594 microorganisms (AOM) in the environment. *Applied Microbiology and Biotechnology* **2010**,  
595 *85*, (3), 425-440.
- 596 32. Purkhold, U.; Wagner, M.; Timmermann, G.; Pommerening-Roser, A.; Koops, H. P.,  
597 16S rRNA and amoA-based phylogeny of 12 novel betaproteobacterial ammonia-oxidizing  
598 isolates: extension of the dataset and proposal of a new lineage within the nitrosomonads.  
599 *International Journal of Systematic and Evolutionary Microbiology* **2003**, *53*, 1485-1494.
- 600 33. Pester, M.; Rattei, T.; Flechl, S.; Grongroft, A.; Richter, A.; Overmann, J.; Reinhold-  
601 Hurek, B.; Loy, A.; Wagner, M., amoA-based consensus phylogeny of ammonia-oxidizing  
602 archaea and deep sequencing of amoA genes from soils of four different geographic regions.  
603 *Environmental Microbiology* **2012**, *14*, (2), 525-539.
- 604 34. Fitzgerald, C. M.; Camejo, P.; Oshlag, J. Z.; Noguera, D. R., Ammonia-oxidizing  
605 microbial communities in reactors with efficient nitrification at low-dissolved oxygen. *Water*  
606 *Res* **2015**, *70*, 38-51.

- 607 35. Davey, M. E.; Duncan, M. J., Enhanced biofilm formation and loss of capsule synthesis:  
608 deletion of a putative glycosyltransferase in *Porphyromonas gingivalis*. *J Bacteriol* **2006**, *188*,  
609 (15), 5510-23.
- 610 36. Li, J. Y.; Wang, N., The *gpsX* gene encoding a glycosyltransferase is important for  
611 polysaccharide production and required for full virulence in *Xanthomonas citri* subsp *citri*. *Bmc*  
612 *Microbiology* **2012**, *12*.
- 613 37. Tao, F.; Swarup, S.; Zhang, L. H., Quorum sensing modulation of a putative  
614 glycosyltransferase gene cluster essential for *Xanthomonas campestris* biofilm formation.  
615 *Environ Microbiol* **2010**, *12*, (12), 3159-70.
- 616 38. Theilacker, C.; Sava, I.; Sanchez-Carballo, P.; Bao, Y.; Kropec, A.; Grohmann, E.;  
617 Holst, O.; Huebner, J., Deletion of the glycosyltransferase *bgsB* of *Enterococcus faecalis* leads  
618 to a complete loss of glycolipids from the cell membrane and to impaired biofilm formation.  
619 *BMC Microbiol* **2011**, *11*, 67.
- 620 39. Wallden, K.; Rivera-Calzada, A.; Waksman, G., Type IV secretion systems: versatility  
621 and diversity in function. *Cell Microbiol* **2010**, *12*, (9), 1203-12.
- 622 40. Klausen, M.; Heydorn, A.; Ragas, P.; Lambertsen, L.; Aaes-Jorgensen, A.; Molin, S.;  
623 Tolker-Nielsen, T., Biofilm formation by *Pseudomonas aeruginosa* wild type, flagella and type  
624 IV pili mutants. *Mol Microbiol* **2003**, *48*, (6), 1511-24.
- 625 41. Zechner, E. L.; Lang, S.; Schildbach, J. F., Assembly and mechanisms of bacterial type  
626 IV secretion machines. *Philos Trans R Soc Lond B Biol Sci* **2012**, *367*, (1592), 1073-87.
- 627 42. Pascoe, B.; Meric, G.; Murray, S.; Yahara, K.; Mageiros, L.; Bowen, R.; Jones, N. H.;  
628 Jeeves, R. E.; Lappin-Scott, H. M.; Asakura, H.; Sheppard, S. K., Enhanced biofilm formation

629 and multi-host transmission evolve from divergent genetic backgrounds in *Campylobacter*  
630 *jejuni*. *Environ Microbiol* **2015**, *17*, (11), 4779-89.

631 43. Bronnec, V.; Turonova, H.; Bouju, A.; Cruveiller, S.; Rodrigues, R.; Demnerova, K.;  
632 Tresse, O.; Haddad, N.; Zagorec, M., Adhesion, Biofilm Formation, and Genomic Features of  
633 *Campylobacter jejuni* Bf, an Atypical Strain Able to Grow under Aerobic Conditions. *Front*  
634 *Microbiol* **2016**, *7*, 1002.

635 44. Wong, E. H. J.; Ng, C. G.; Chua, E. G.; Tay, A. C. Y.; Peters, F.; Marshall, B. J.; Ho,  
636 B.; Goh, K. L.; Vadivelu, J.; Loke, M. F., Comparative Genomics Revealed Multiple  
637 *Helicobacter pylori* Genes Associated with Biofilm Formation In Vitro. *Plos One* **2016**, *11*,  
638 (11).

639 45. Chipasa, K. B.; Medrzycka, K., Behavior of lipids in biological wastewater treatment  
640 processes. *J Ind Microbiol Biotechnol* **2006**, *33*, (8), 635-45.

641 46. Koch, H.; Lucker, S.; Albertsen, M.; Kitzinger, K.; Herbold, C.; Spieck, E.; Nielsen, P.  
642 H.; Wagner, M.; Daims, H., Expanded metabolic versatility of ubiquitous nitrite-oxidizing  
643 bacteria from the genus *Nitrospira*. *Proc Natl Acad Sci U S A* **2015**, *112*, (36), 11371-6.

644 47. Nowka, B.; Off, S.; Daims, H.; Spieck, E., Improved isolation strategies allowed the  
645 phenotypic differentiation of two *Nitrospira* strains from widespread phylogenetic lineages.  
646 *FEMS Microbiol Ecol* **2015**, *91*, (3).

647 48. Deboer, W.; Laanbroek, H. J., Ureolytic Nitrification at Low Ph by *Nitrosospira* Spec.  
648 *Arch Microbiol* **1989**, *152*, (2), 178-181.

649 49. Koops, H. P.; Bottcher, B.; Moller, U. C.; Pommereningroser, A.; Stehr, G.,  
650 Classification of 8 New Species of Ammonia-Oxidizing Bacteria - *Nitrosomonas-Communis*



651 Sp-Nov, Nitrosomonas-Ureae Sp-Nov, Nitrosomonas-Aestuarii Sp-Nov, Nitrosomonas-  
652 Marina Sp-Nov, Nitrosomonas-Nitrosa Sp-Nov, Nitrosomonas-Eutropha Sp-Nov,  
653 Nitrosomonas-Oligotropha Sp-Nov and Nitrosomonas-Halophila Sp-Nov. *J Gen Microbiol*  
654 **1991**, *137*, 1689-1699.

655 50. Koper, T. E.; El-Sheikh, A. F.; Norton, J. M.; Klotz, M. G., Urease-encoding genes in  
656 ammonia-oxidizing bacteria. *Appl Environ Microb* **2004**, *70*, (4), 2342-2348.

657 51. Palatinszky, M.; Herbold, C.; Jehmlich, N.; Pogoda, M.; Han, P.; von Bergen, M.;  
658 Lagkouvardos, I.; Karst, S. M.; Galushko, A.; Koch, H.; Berry, D.; Daims, H.; Wagner, M.,  
659 Cyanate as an energy source for nitrifiers. *Nature* **2015**, *524*, (7563), 105-+.

660 52. Qian, M. W.; Eaton, J. W.; Wolff, S. P., Cyanate-mediated inhibition of neutrophil  
661 myeloperoxidase activity. *Biochemical Journal* **1997**, *326*, 159-166.

662 53. Purcarea, C.; Ahuja, A.; Lu, T.; Kovari, L.; Guy, H. I.; Evans, D. R., Aquifex aeolicus  
663 aspartate transcarbamoylase, an enzyme specialized for the efficient utilization of unstable  
664 carbamoyl phosphate at elevated temperature. *Journal of Biological Chemistry* **2003**, *278*, (52),  
665 52924-52934.

666 54. Ubalua, A. O., Cyanogenic Glycosides and the fate of cyanide in soil. *Australian*  
667 *Journal of Crop Science* **2010**, *4*, (4), 223-237.

668 55. Widner, B.; Mulholland, M. R.; Mopper, K., Chromatographic Determination of  
669 Nanomolar Cyanate Concentrations in Estuarine and Sea Waters by Precolumn Fluorescence  
670 Derivatization. *Analytical Chemistry* **2013**, *85*, (14), 6661-6666.

- 671 56. Ushiki, N.; Fujitani, H.; Aoi, Y.; Tsuneda, S., Isolation of Nitrospira belonging to  
672 Sublineage II from a Wastewater Treatment Plant. *Microbes and Environments* **2013**, *28*, (3),  
673 346-353.
- 674 57. Gruber-Dorninger, C.; Pester, M.; Kitzinger, K.; Savio, D. F.; Loy, A.; Rattei, T.;  
675 Wagner, M.; Daims, H., Functionally relevant diversity of closely related Nitrospira in  
676 activated sludge. *Isme Journal* **2015**, *9*, (3), 643-655.
- 677 58. Koch, H.; Galushko, A.; Albertsen, M.; Schintlmeister, A.; Gruber-Dorninger, C.;  
678 Lucker, S.; Pelletier, E.; Le Paslier, D.; Spieck, E.; Richter, A.; Nielsen, P. H.; Wagner, M.;  
679 Daims, H., Growth of nitrite-oxidizing bacteria by aerobic hydrogen oxidation. *Science* **2014**,  
680 *345*, (6200), 1052-1054.
- 681 59. Silva, P. J.; de Castro, B.; Hagen, W. R., On the prosthetic groups of the NiFe  
682 sulfhydrogenase from Pyrococcus furiosus: topology, structure, and temperature-dependent  
683 redox chemistry. *J Biol Inorg Chem* **1999**, *4*, (3), 284-91.
- 684 60. Andrews, S. C.; Berks, B. C.; McClay, J.; Ambler, A.; Quail, M. A.; Golby, P.; Guest,  
685 J. R., A 12-cistron Escherichia coli operon (hyf) encoding a putative proton-translocating  
686 formate hydrogenlyase system. *Microbiology* **1997**, *143* ( Pt 11), 3633-47.
- 687 61. Ferry, J. G., Co Dehydrogenase. *Annual Review of Microbiology* **1995**, *49*, 305-333.
- 688 62. Sant'Anna, F. H.; Lebedinsky, A. V.; Sokolova, T. G.; Robb, F. T.; Gonzalez, J. M.,  
689 Analysis of three genomes within the thermophilic bacterial species Caldanaerobacter  
690 subterraneus with a focus on carbon monoxide dehydrogenase evolution and hydrolase  
691 diversity. *Bmc Genomics* **2015**, *16*.

- 692 63. Stover, C. K.; Pham, X. Q.; Erwin, A. L.; Mizoguchi, S. D.; Warrenner, P.; Hickey, M.  
693 J.; Brinkman, F. S. L.; Hufnagle, W. O.; Kowalik, D. J.; Lagrou, M.; Garber, R. L.; Goltry, L.;  
694 Tolentino, E.; Westbrook-Wadman, S.; Yuan, Y.; Brody, L. L.; Coulter, S. N.; Folger, K. R.;  
695 Kas, A.; Larbig, K.; Lim, R.; Smith, K.; Spencer, D.; Wong, G. K. S.; Wu, Z.; Paulsen, I. T.;  
696 Reizer, J.; Saier, M. H.; Hancock, R. E. W.; Lory, S.; Olson, M. V., Complete genome sequence  
697 of *Pseudomonas aeruginosa* PAO1, an opportunistic pathogen. *Nature* **2000**, *406*, (6799), 959-  
698 964.
- 699 64. Gioia, J.; Qin, X.; Jiang, H. Y.; Clinkenbeard, K.; Lo, R.; Liu, Y. M.; Fox, G. E.;  
700 Yerrapragada, S.; McLeod, M. P.; McNeill, T. Z.; Hemphill, L.; Sodergren, E.; Wang, Q. Y.;  
701 Muzny, D. M.; Homsy, F. J.; Weinstock, G. A.; Highlander, S. K., The genome sequence of  
702 *Mannheimia haemolytica* A1: Insights into virulence, natural competence, and Pasteurellaceae  
703 phylogeny. *Journal of Bacteriology* **2006**, *188*, (20), 7257-7266.
- 704 65. Brinkrolf, K.; Brune, I.; Tauch, A., The transcriptional regulatory network of the amino  
705 acid producer *Corynebacterium glutamicum*. *J Biotechnol* **2007**, *129*, (2), 191-211.
- 706 66. Schlensog, V.; Lutz, S.; Bock, A., Purification and DNA-binding properties of FHLA,  
707 the transcriptional activator of the formate hydrogenlyase system from *Escherichia coli*. *J Biol*  
708 *Chem* **1994**, *269*, (30), 19590-6.
- 709 67. Toesca, I.; Perard, C.; Bouvier, J.; Gutierrez, C.; Conter, A., The transcriptional  
710 activator NhaR is responsible for the osmotic induction of *osmC(p1)*, a promoter of the stress-  
711 inducible gene *osmC* in *Escherichia coli*. *Microbiology-Sgm* **2001**, *147*, 2795-2803.
- 712 68. Goller, C.; Wang, X.; Itoh, Y.; Romeo, T., The cation-responsive protein NhaR of  
713 *Escherichia coli* activates *pgaABCD* transcription, required for production of the biofilm  
714 adhesin poly-beta-1,6-N-acetyl-D-glucosamine. *J Bacteriol* **2006**, *188*, (23), 8022-32.

- 715 69. Storz, G.; Tartaglia, L. A., OxyR: a regulator of antioxidant genes. *J Nutr* **1992**, *122*,  
716 (3 Suppl), 627-30.
- 717 70. Bueno, E.; Mesa, S.; Bedmar, E. J.; Richardson, D. J.; Delgado, M. J., Bacterial  
718 adaptation of respiration from oxic to microoxic and anoxic conditions: redox control. *Antioxid*  
719 *Redox Signal* **2012**, *16*, (8), 819-52.
- 720 71. Green, J.; Crack, J. C.; Thomson, A. J.; LeBrun, N. E., Bacterial sensors of oxygen.  
721 *Curr Opin Microbiol* **2009**, *12*, (2), 145-51.
- 722 72. Green, J.; Scott, C.; Guest, J. R., Functional versatility in the CRP-FNR superfamily of  
723 transcription factors: FNR and FLP. *Adv Microb Physiol* **2001**, *44*, 1-34.
- 724 73. Reents, H.; Munch, R.; Dammeyer, T.; Jahn, D.; Hartig, E., The Fnr regulon of *Bacillus*  
725 *subtilis*. *J Bacteriol* **2006**, *188*, (3), 1103-12.
- 726 74. Salmon, K.; Hung, S. P.; Mekjian, K.; Baldi, P.; Hatfield, G. W.; Gunsalus, R. P.,  
727 Global gene expression profiling in *Escherichia coli* K12. The effects of oxygen availability  
728 and FNR. *J Biol Chem* **2003**, *278*, (32), 29837-55.
- 729 75. Park, H. D.; Noguera, D. R., *Nitrospira* community composition in nitrifying reactors  
730 operated with two different dissolved oxygen levels. *J Microbiol Biotechnol* **2008**, *18*, (8),  
731 1470-4.
- 732 76. Padan, E.; Maisler, N.; Taglicht, D.; Karpel, R.; Schuldiner, S., Deletion of *ant* in  
733 *Escherichia coli* reveals its function in adaptation to high salinity and an alternative Na<sup>+</sup>/H<sup>+</sup>  
734 antiporter system(s). *J Biol Chem* **1989**, *264*, (34), 20297-302.

- 735 77. Conter, A.; Gangneux, C.; Suzanne, M.; Gutierrez, C., Survival of *Escherichia coli*  
736 during long-term starvation: effects of aeration, NaCl, and the rpoS and osmC gene products.  
737 *Research in Microbiology* **2001**, *152*, (1), 17-26.
- 738 78. Mongkolsuk, S.; Praituan, W.; Loprasert, S.; Fuangthong, M.; Chamnongpol, S.,  
739 Identification and characterization of a new organic hydroperoxide resistance (ohr) gene with  
740 a novel pattern of oxidative stress regulation from *Xanthomonas campestris* pv. *phaseoli*. *J*  
741 *Bacteriol* **1998**, *180*, (10), 2636-43.
- 742 79. Itoh, Y.; Wang, X.; Hinnebusch, B. J.; Preston, J. F., 3rd; Romeo, T., Depolymerization  
743 of beta-1,6-N-acetyl-D-glucosamine disrupts the integrity of diverse bacterial biofilms. *J*  
744 *Bacteriol* **2005**, *187*, (1), 382-7.
- 745 80. Bren, A.; Welch, M.; Blat, Y.; Eisenbach, M., Signal termination in bacterial  
746 chemotaxis: CheZ mediates dephosphorylation of free rather than switch-bound CheY. *Proc*  
747 *Natl Acad Sci U S A* **1996**, *93*, (19), 10090-3.
- 748 81. Khan, S.; Amoyaw, K.; Spudich, J. L.; Reid, G. P.; Trentham, D. R., Bacterial  
749 chemoreceptor signaling probed by flash photorelease of a caged serine. *Biophys J* **1992**, *62*,  
750 (1), 67-8.
- 751 82. Unden, G.; Schirawski, J., The oxygen-responsive transcriptional regulator FNR of  
752 *Escherichia coli*: the search for signals and reactions. *Mol Microbiol* **1997**, *25*, (2), 205-10.
- 753 83. Spiro, S.; Guest, J. R., FNR and its role in oxygen-regulated gene expression in  
754 *Escherichia coli*. *FEMS Microbiol Rev* **1990**, *6*, (4), 399-428.

755 84. Li, B.; Wing, H.; Lee, D.; Wu, H. C.; Busby, S., Transcription activation by Escherichia  
756 coli FNR protein: similarities to, and differences from, the CRP paradigm. *Nucleic Acids Res*  
757 **1998**, 26, (9), 2075-81.

758
